# Supplementary material for: Unprecedentedly high efficiency for photocatalytic conversion of methane to methanol over Au–Pd/TiO2 – what is the role of each component in the system?
Source: Royal Society of Chemistry journal article supplement (doi:10.1039/d1ta00420d), 2021-01-01
Supplement: d1ta00420d1.pdf [file d1ta00420d1.pdf]

## Supplementary information

### Unprecedented high efficiency for photocatalytic conversion of methane into methanol over Au-Pd/TiO<sub>2</sub> – what is the role of each component in the system?

Xiaojiao Cai,<sup>a</sup> Siyuan Fang,<sup>b</sup> Yun Hang Hu<sup>ab\*</sup>

<sup>a</sup> School of Environmental Science and Engineering, Shanghai Jiao Tong University, Shanghai 200240, People's Republic of China

<sup>b</sup> Department of Materials Science and Engineering, Michigan Technological University, Houghton, Michigan 49931-1295, United States

\*Corresponding author: [yunhangh@mtu.edu](mailto:yunhangh@mtu.edu)

#### 1. X-ray diffraction patterns

As shown in Fig. S1, all the samples had similar XRD patterns. Characteristic peaks at 25.4°, 37.9°, 48.1°, 54.1°, 55.2°, 62.9°, and 75.2° are corresponding to (101), (004), (200), (105), (211), (204), and (215) planes of anatase TiO<sub>2</sub> (JCPDS, no.21-1272) respectively, while no peak due to rutile TiO<sub>2</sub> was observed. Characteristic diffraction peaks of Au or Pd were not observed either, indicating the high dispersion and small size of metal NPs. Furthermore, the peak corresponding to anatase TiO<sub>2</sub> (101) shifted to a higher diffraction angle after depositing Au-Pd alloy, implying a stronger affinity between Au-Pd alloy and TiO<sub>2</sub> compared with single Au and Pd NPs.

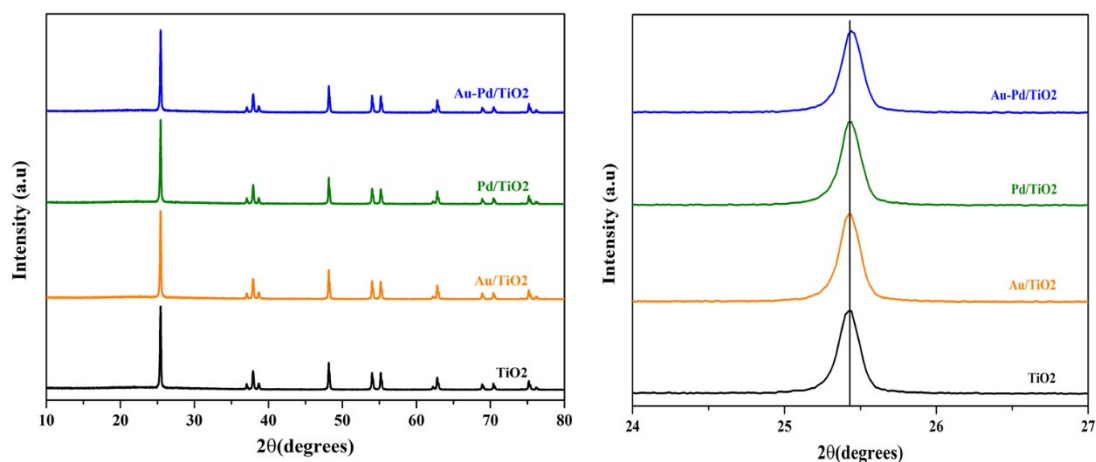

**Fig. S1** XRD patterns of TiO<sub>2</sub>, Au/TiO<sub>2</sub>, Pd/TiO<sub>2</sub>, and Au-Pd/TiO<sub>2</sub>.

## 2. Photocatalytic methane oxidation over Au-Pd/TiO<sub>2</sub> with various Au-Pd loading amounts

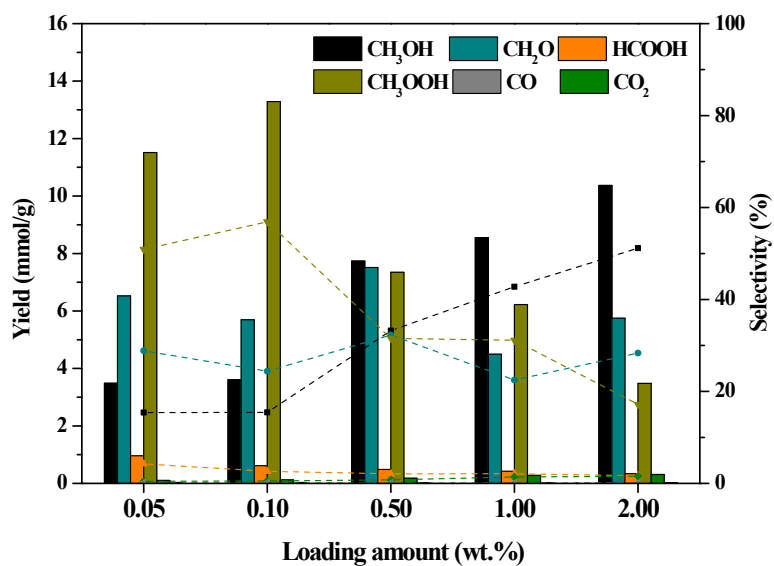

**Fig. S2** Photocatalytic methane oxidation over Au-Pd/TiO<sub>2</sub> with various Au-Pd loading amounts under UV-visible light irradiation (5 mg catalyst, 30 mL water, 3.0 MPa CH<sub>4</sub>, 1.0 MPa O<sub>2</sub>, 1 h reaction).

### 3. TEM images of Au-Pd/TiO<sub>2</sub> with various Au-Pd loading amounts and their size distributions.

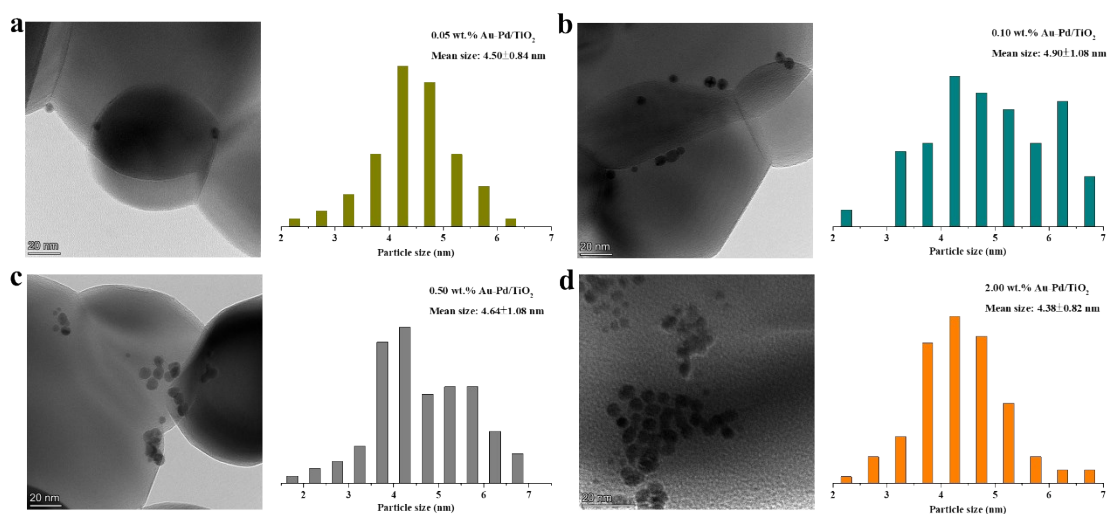

**Fig. S3** TEM images of Au-Pd/TiO<sub>2</sub> with various Au-Pd loading amounts (0.05, 0.10, 0.50, and 2.00 wt.%) and their size distributions.

### 4. Mott-Schottky plot

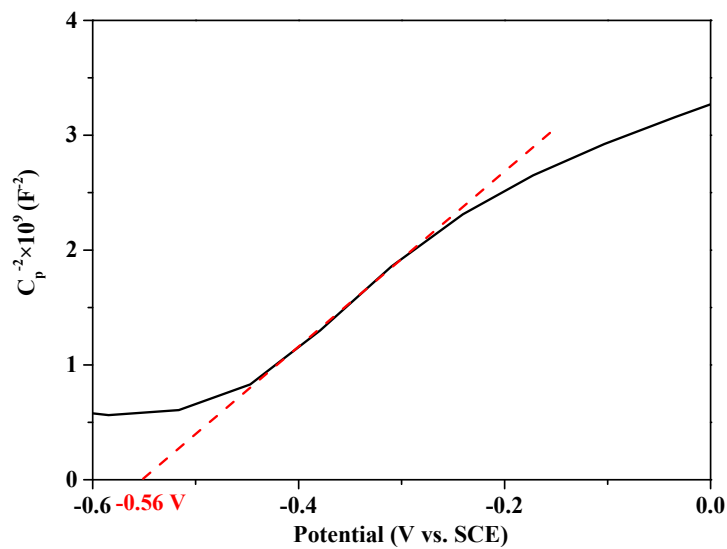

**Fig. S4** Mott-Schottky plot of Au-Pd/TiO<sub>2</sub> recorded at 1000 Hz.

## 5. Electron paramagnetic resonance spectra

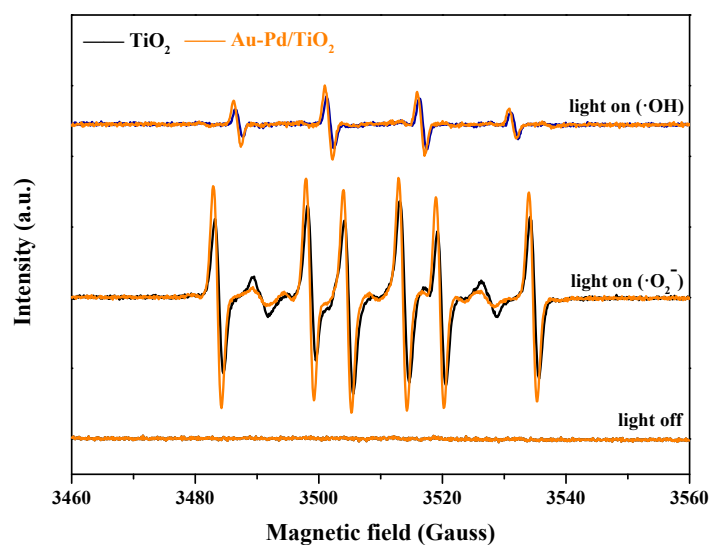

**Fig. S5** EPR spectra of the catalyst suspension with 5,5-dimethyl-1-pyrroline N-oxide (DMPO) as the spin probe.

## 6. Photocatalytic methane oxidation under various partial pressures

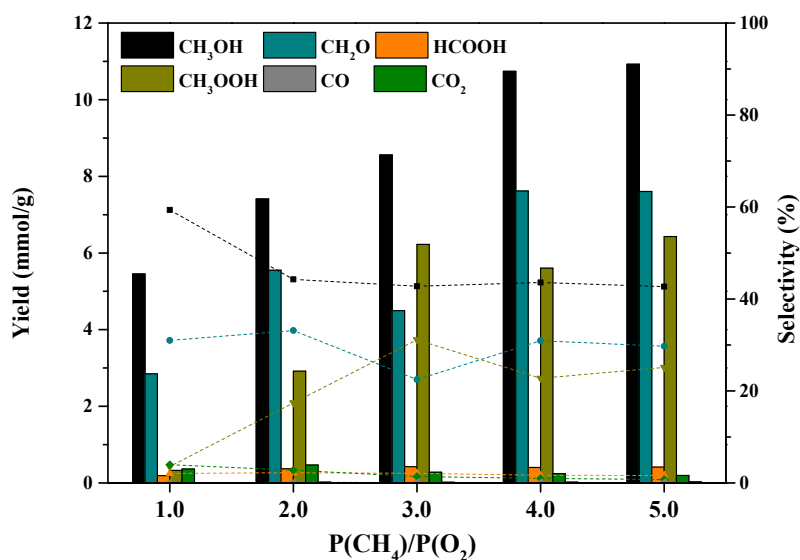

**Fig. S6** Photocatalytic methane oxidation over Au-Pd/TiO<sub>2</sub> under various partial pressures under UV-visible light irradiation (5 mg catalyst, 30 mL water, 1.0-5.0 MPa CH<sub>4</sub>, 1.0 MPa O<sub>2</sub>, 1 h reaction).

## 7. Reported photocatalytic activities of methane conversion into methanol

**Table S1.** Reported photocatalytic activities of methane conversion into methanol.

| Catalyst                                                            | Oxidant                              | Pressure or flowrate                              | Temp. (°C) | Light source                           | Yield (μmol/g·h)                  | Selectivity                                       | Ref.      |
|---------------------------------------------------------------------|--------------------------------------|---------------------------------------------------|------------|----------------------------------------|-----------------------------------|---------------------------------------------------|-----------|
| V-MCM-41                                                            | NO                                   | 0.0006 MPa CH <sub>4</sub>                        | 22         | 100 W leg lamp<br>> 270 nm             | 3.35                              | 88.4%                                             | 1         |
| NiO                                                                 | H <sub>2</sub> O                     | dissolved CH <sub>4</sub>                         | 25         | high-power laser<br>355 nm             | 289                               | -                                                 | 2         |
| TiO <sub>2</sub>                                                    |                                      |                                                   |            |                                        | 429                               | -                                                 |           |
| WO <sub>3</sub>                                                     |                                      |                                                   |            |                                        | 529                               | -                                                 |           |
| Ag <sub>2</sub> O/WO <sub>3</sub>                                   |                                      |                                                   |            |                                        | 2598                              | -                                                 |           |
| beta zeolite (HBEA)                                                 | H <sub>2</sub> O                     | 4.5 mL/min CH <sub>4</sub><br>17.9 mL/min He      | 70         | medium-pressure mercury lamp           | 10                                | 2.4%                                              | 4         |
| V-HBEA                                                              |                                      |                                                   |            |                                        | 11.3                              | 5.3%                                              |           |
| Bi-V-HBEA                                                           |                                      |                                                   |            |                                        | 10.7                              | 6.4%                                              |           |
| V-HBEA                                                              |                                      |                                                   |            |                                        | 2.7                               | 81.6%                                             |           |
| Bi-V-HBEA                                                           |                                      |                                                   |            |                                        | 3.3                               | 100%                                              |           |
| BiVO <sub>4</sub> thin platelet                                     | H <sub>2</sub> O                     | 10% CH <sub>4</sub> in Ar                         | 65         | 350 W xenon lamp                       | 65.7                              | 58.2%                                             | 5         |
| BiVO <sub>4</sub> thick platelet                                    |                                      |                                                   |            |                                        | 79.2                              | 85.7%                                             |           |
| BiVO <sub>4</sub> bipyramid                                         |                                      |                                                   |            |                                        | 111.9                             | 85%                                               |           |
| BiVO <sub>4</sub>                                                   | H <sub>2</sub> O                     | 4.5 mL/min CH <sub>4</sub><br>17.9 mL/min He      | 55         | medium-pressure mercury lamp           | 19.9                              | 42%                                               | 6         |
|                                                                     | 1 mM NO <sub>2</sub> <sup>-</sup>    |                                                   |            |                                        | 11.0                              | 100%                                              |           |
| Bi <sub>2</sub> WO <sub>6</sub> flower                              | H <sub>2</sub> O                     | 4.5 mL/min CH <sub>4</sub><br>17.9 mL/min He      | 55         | medium-pressure mercury lamp           | 15.6                              | 29.3%                                             | 7         |
| Bi <sub>2</sub> WO <sub>6</sub> /TiO <sub>2</sub>                   | H <sub>2</sub> O                     |                                                   |            |                                        | 10.8                              | 7.9%                                              |           |
| BiVO <sub>4</sub> platelet                                          | H <sub>2</sub> O                     |                                                   |            |                                        | 20.8                              | 51%                                               |           |
| F/WO <sub>3</sub>                                                   | H <sub>2</sub> O                     |                                                   |            |                                        | 7.9                               | 17.9%                                             |           |
| La/WO <sub>3</sub>                                                  | H <sub>2</sub> O                     |                                                   |            |                                        | 31.4                              | 46%                                               |           |
| mesoporous WO <sub>3</sub>                                          | H <sub>2</sub> O                     | 4.5 mL/min CH <sub>4</sub><br>17.9 mL/min He      | 55         | medium-pressure mercury lamp           | 27.2                              | 46%                                               | 10        |
|                                                                     | 2 mM Fe <sup>3+</sup>                |                                                   |            |                                        | 55.5                              | 37.4%                                             |           |
|                                                                     | 0.1 mM Cu <sup>2+</sup>              |                                                   |            |                                        | 45.7                              | 30.4%                                             |           |
|                                                                     | 2 mM Ag <sup>+</sup>                 |                                                   |            |                                        | 16.5                              | 11.8%                                             |           |
|                                                                     | 2 mM H <sub>2</sub> O <sub>2</sub>   |                                                   |            |                                        | 20.3                              | 34.3%                                             |           |
| FeO <sub>x</sub> /TiO <sub>2</sub>                                  | 0.8 mM H <sub>2</sub> O <sub>2</sub> | 70 μmol CH <sub>4</sub> in Ar                     | 25         | 300 W xenon lamp with<br>710-nm filter | 352                               | 90%                                               | 11        |
| FeOOH/m-WO <sub>3</sub>                                             | 1.5 mM H <sub>2</sub> O <sub>2</sub> | 0.01 MPa CH <sub>4</sub>                          | 25         | 300 W xenon lamp<br>420-780 nm         | 239                               | 91%                                               | 12        |
| g-C <sub>3</sub> N <sub>4</sub> @Cs <sub>0.33</sub> WO <sub>3</sub> | O <sub>2</sub>                       | pure air containing 1000 ppm CH <sub>4</sub>      | 25         | 300 W xenon lamp                       | 4.38                              | 51.6%                                             | 13        |
| CuMoO <sub>4</sub> /SiO <sub>2</sub>                                | O <sub>2</sub>                       | CH <sub>4</sub> :O <sub>2</sub> = 9:1             | 100        | 1000 W xenon lamp                      | 15                                | -                                                 | 14        |
| MoO <sub>4</sub> /SiO <sub>2</sub>                                  |                                      |                                                   |            |                                        | 5                                 | -                                                 |           |
| silica gel                                                          |                                      |                                                   |            |                                        | 948                               | 52.1%                                             |           |
| silicalite                                                          |                                      |                                                   |            |                                        | 1597                              | 46.5%                                             |           |
| beta (Si F)                                                         |                                      |                                                   |            |                                        | 1917                              | 50.7%                                             |           |
| beta (Al F)                                                         | O <sub>2</sub> (H <sub>2</sub> O)    | 0.05 MPa CH <sub>4</sub>                          | 25         | mercury lamp<br>185 nm                 | 3604                              | 49.8%                                             | 15        |
| beta (Si OH)                                                        |                                      |                                                   |            |                                        | 4284                              | 48.0%                                             |           |
| beta (Al OH)                                                        |                                      |                                                   |            |                                        | 3965                              | 54.9%                                             |           |
| Quantum-sized BiVO <sub>4</sub>                                     |                                      |                                                   |            |                                        | O <sub>2</sub> (H <sub>2</sub> O) | 1.0 MPa CH <sub>4</sub><br>1.0 MPa O <sub>2</sub> |           |
| Au/black phosphorus                                                 | O <sub>2</sub> (H <sub>2</sub> O)    | 3.0 MPa CH <sub>4</sub><br>0.3 MPa O <sub>2</sub> | 90         | xenon lamp                             | 57                                | 99%                                               | 17        |
| TiO <sub>2</sub>                                                    | O <sub>2</sub> (H <sub>2</sub> O)    | 0.0045 MPa CH <sub>4</sub>                        | 60         | 250 W high-pressure<br>mercury lamp    | 7                                 | 1.57%                                             | 18        |
| Mo/TiO <sub>2</sub>                                                 |                                      | 0.0005 MPa O <sub>2</sub>                         |            |                                        | 12.5                              | 1.41%                                             |           |
|                                                                     |                                      | 0.0050 MPa He                                     |            |                                        |                                   |                                                   |           |
| Au-CoO <sub>x</sub> /TiO <sub>2</sub>                               | O <sub>2</sub> (H <sub>2</sub> O)    | 2.0 MPa CH <sub>4</sub><br>0.1 MPa O <sub>2</sub> | 25         | 300 W xenon lamp<br>300-500 nm         | 1500                              | 57%                                               | 19        |
| Pt/ZnO                                                              |                                      |                                                   |            |                                        | 2225                              | 19.1%                                             |           |
| Pd/ZnO                                                              |                                      |                                                   |            |                                        | 3035                              | 26.2%                                             |           |
| Au/ZnO                                                              |                                      |                                                   |            |                                        | 2060                              | 15.7%                                             |           |
| Ag/ZnO                                                              |                                      |                                                   |            |                                        | 365                               | 5%                                                |           |
| Au/ZnO                                                              | O <sub>2</sub> (H <sub>2</sub> O)    | 1.5 MPa CH <sub>4</sub><br>0.5 MPa O <sub>2</sub> | 30         | xenon lamp                             | 686                               | 99%                                               | 21        |
| Au-Pd/TiO <sub>2</sub>                                              | O <sub>2</sub> (H <sub>2</sub> O)    | 3.0 MPa CH <sub>4</sub><br>1.0 MPa O <sub>2</sub> | 42         | xenon lamp                             | 8557                              | 42.8%                                             | this work |
|                                                                     |                                      |                                                   |            |                                        | (30 mL H <sub>2</sub> O)          | (30 mL H <sub>2</sub> O)                          |           |
|                                                                     |                                      |                                                   |            |                                        | (50 mL H <sub>2</sub> O)          | (50 mL H <sub>2</sub> O)                          |           |

## 8. Composition of O1s X-ray photoelectron spectra

**Table S2.** Binding energies and atomic ratios of lattice oxygen ( $O_L$ ), oxygen from surface hydroxyl ( $O_H$ ), and oxygen from adsorbed water ( $O_W$ ).

| Sample                 | $O_L$           | $O_H$           | $O_W$           |
|------------------------|-----------------|-----------------|-----------------|
| Bare TiO <sub>2</sub>  | 529.80 (68.08%) | 531.09 (8.84%)  | 532.10 (23.07%) |
| Au/TiO <sub>2</sub>    | 530.06 (78.91%) | 531.13 (10.23%) | 532.23 (10.86%) |
| Pd/TiO <sub>2</sub>    | 529.82 (87.58%) | 530.97 (5.55%)  | 532.27 (6.87%)  |
| Au-Pd/TiO <sub>2</sub> | 529.81 (77.74%) | 530.97 (14.53%) | 532.31 (7.73%)  |

## Reference

1. Y. Hu, M. Anpo and C. Wei, *J. Photochem. Photobiol., A* 2013, **264**, 48-55.
2. M. A. Gondal, A. Hameed, Z. H. Yamani and A. Arfaj, *Chem. Phys. Lett.* , 2004, **392**, 372-377.
3. A. Hameed, I. M. I. Ismail, M. Aslam and M. A. Gondal, *Appl. Catal., A*, 2014, **470**, 327-335.
4. S. Murcia-López, M. C. Bacariza, K. Villa, J. M. Lopes, C. Henriques, J. R. Morante and T. Andreu, *ACS Catal.*, 2017, **7**, 2878-2885.
5. W. Zhu, M. Shen, G. Fan, A. Yang, J. R. Meyer, Y. Ou, B. Yin, J. Fortner, M. Foston, Z. Li, Z. Zou and B. Sadtler, *ACS Appl. Nano Mater.*, 2018, **1**, 6683-6691.
6. S. Murcia-López, K. Villa, T. Andreu and J. R. Morante, *Chem. Commun.* , 2015, **51**, 7249-7252.
7. S. Murcia-López, K. Villa, T. Andreu and J. R. Morante, *ACS Catal.*, 2014, **4**, 3013-3019.
8. K. Villa, S. Murcia-López, T. Andreu and J. R. Morante, *Catal. Commun.* , 2015, **58**, 200-203.
9. K. Villa, S. Murcia-López, J. R. Morante and T. Andreu, *Appl. Catal., B* 2016, **187**, 30-36.
10. K. Villa, S. Murcia-López, T. Andreu and J. R. Morante, *Appl. Catal., B* 2015, **163**, 150-155.

11. J. Xie, R. Jin, A. Li, Y. Bi, Q. Ruan, Y. Deng, Y. Zhang, S. Yao, G. Sankar, D. Ma and J. Tang, *Nat. Catal.*, 2018, **1**, 889-896.
12. J. Yang, J. Hao, J. Wei, J. Dai and Y. Li, *Fuel*, 2020, **266**, 117104.
13. Y. Li, J. Li, G. Zhang, K. Wang and X. Wu, *ACS Sustain. Chem. Eng.*, 2019, **7**, 4382-4389.
14. M. D. Ward, J. F. Brazdil, S. P. Mehandru and A. B. Anderson, *J. Phys. Chem.*, 1987, **91**, 6515-6521.
15. F. Sastre, V. Fornés, A. Corma and H. García, *J. Am. Chem. Soc.*, 2011, **133**, 17257-17261.
16. Y. Fan, W. Zhou, X. Qiu, H. Li, Y. Jiang, Z. Sun, D. Han, L. Niu and Z. Tang, *Nat. Sustain.*, 2021, DOI: 10.1038/s41893-021-00682-x.
17. L. Luo, J. Luo, H. Li, F. Ren, Y. Zhang, A. Liu, W.-X. Li and J. Zeng, *Nat. Comm.*, 2021, **12**, 1218.
18. X. Chen and S. Li, *Chem. Lett.*, 2000, **29**, 314-315.
19. H. Song, X. Meng, S. Wang, W. Zhou, S. Song, T. Kako and J. Ye, *ACS Catal.*, 2020, **10**, 14318-14326.
20. H. Song, X. Meng, S. Wang, W. Zhou, X. Wang, T. Kako and J. Ye, *J. Am. Chem. Soc.*, 2019, **141**, 20507-20515.
21. W. Zhou, X. Qiu, Y. Jiang, Y. Fan, S. Wei, D. Han, L. Niu and Z. Tang, *J. Mater. Chem. A*, 2020, **8**, 13277-13284.
